# Supplementary material for: An iron-based polyanionic cathode for potassium storage with high capacity and excellent cycling stability
Source: Royal Society of Chemistry journal article supplement (doi:10.1039/d0ta01239d), 2020-01-01
Supplement: d0ta01239d1.pdf [file d0ta01239d1.pdf]

## Electronic Supplementary Information

### **An Iron-based Polyanionic Cathode for Potassium Storage with High Capacity and Excellent Cycling Stability**

Haiyan He<sup>a,b,1</sup>, Wenjiao Yao<sup>a,1</sup>, Sarayut Tunmee<sup>c,1</sup>, Xiaolong Zhou<sup>a</sup>, Bifa Ji<sup>a,d</sup>,  
Nanzhong Wu<sup>a,d</sup>, Tianyi Song<sup>a,b</sup>, Pinit Kidkhunthod<sup>c</sup>, Yongbing Tang<sup>a,\*</sup>

- a. Functional Thin Films Research Center, Shenzhen Institutes of Advanced Technology, Chinese Academy of Sciences, Shenzhen 518055, China
- b. Nano Science and Technology Institute, University of Science and Technology of China, Suzhou 215123, China
- c. Synchrotron Light Research Institute, Nakhon Ratchasima 30000, Thailand
- d. University of Chinese Academy of Sciences, Beijing 100049, China

□ Corresponding authors.

E-mail addresses: [tangyb@siat.ac.cn](mailto:tangyb@siat.ac.cn)

<sup>1</sup> H.Y. He, W.J. Yao and S. Tunmee contributed equally to this work.

## Table of contents

1. Fig. S1 Coordination of Fe, Li, and K in KLFO
2. Fig. S2 K-O distance in KLFO in comparison with statistic values
3. Fig. S3 FT-IR and Raman spectra of pristine KLFO sample
4. Fig. S4 SEM and EDS mapping of KLFO@C
5. Fig. S5 Powder XRD patterns of samples at different stages
6. Fig. S6 Brunauer–Emmett–Teller surface area and pore structure of KLFO@C sample
7. Fig. S7 Capacity retention of cells in different electrolytes
8. Fig. S8. Linear sweep voltammtry of the pure electrolyte cell
9. Fig. S9 Galvonostatic charging and discharging curves and cycle stability in different voltage windows
10. Fig. S10 dQ/dV curve
11. Fig. S11 GCD curve and cycles stability of a cell under the current density of 25 mA g<sup>-1</sup>
12. Fig. S12 Specific percentages of diffusion control at different scan rates
13. Fig. S13 GCD curves at different current densities
14. Fig. S14. Motif of [FeO<sub>6</sub>] octahedron
15. Table S1 Rietveld refinement of pristine KLFO
16. Table S2. Assignments of peaks in FTIR and Raman spectra
17. Table S3. Fitting of Fe K-edge EXAFS of pristine KLFO
18. Table S4 Quantitative analysis of the oxidation state of Fe
19. Table S5 Electrochemical performances of KLFO@C and cathode materials of recently reported for potassium-ion devices
20. References

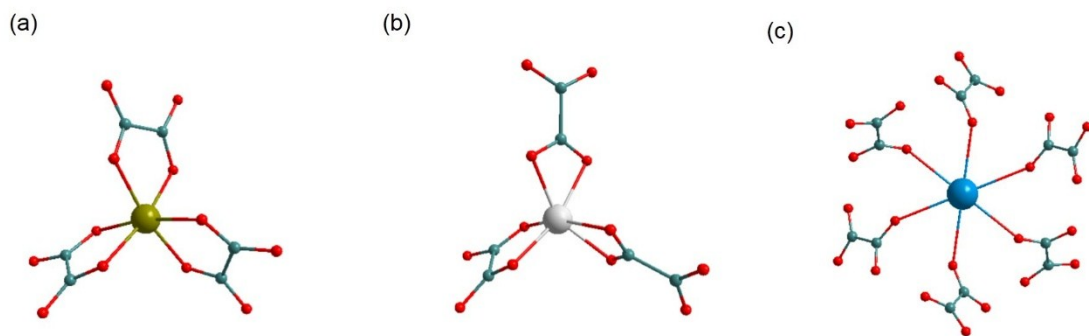

**Fig. S1.** Coordination of (a) Fe, (b) Li, and (c) K in KLFO.

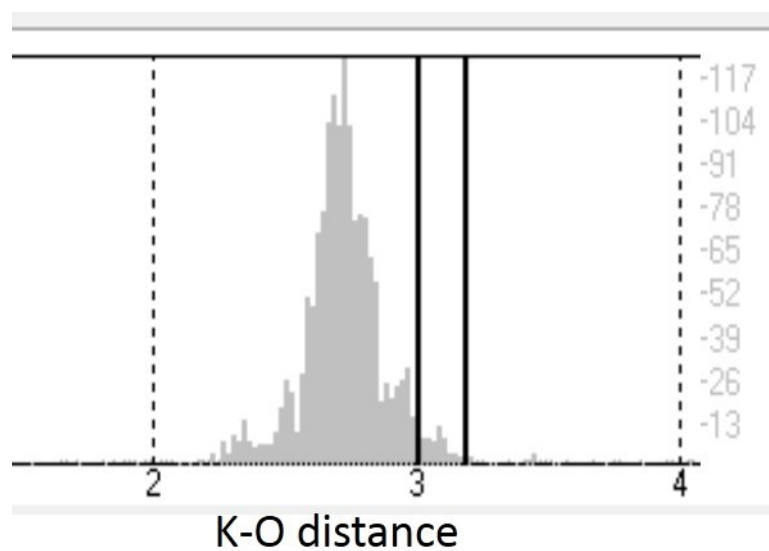

**Fig. S2.** K-O distance in KLFO in comparison with statistic values. Gray: 1681 compounds from statistic. Black: KLFO.

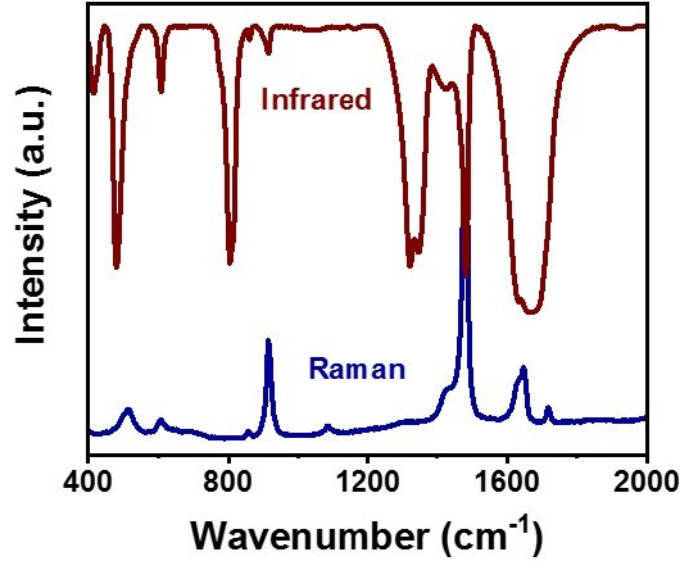

**Fig. S3.** FT-IR and Raman spectra of pristine KLFO sample.

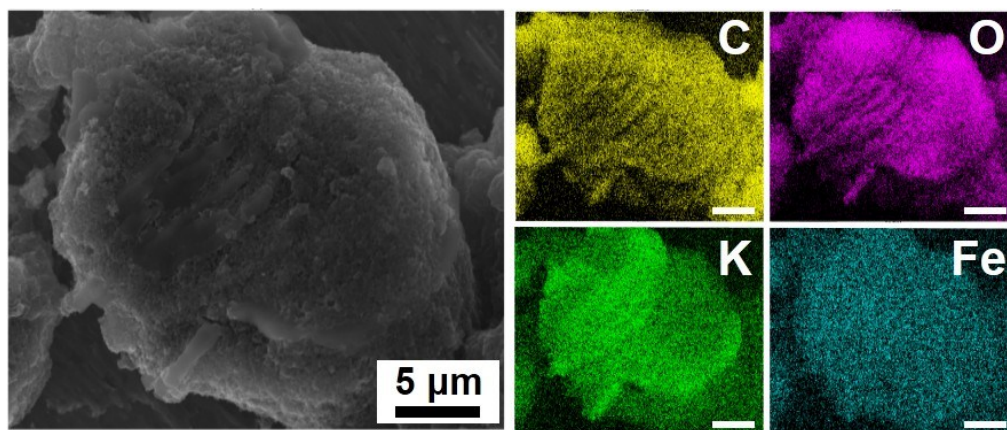

**Fig. S4.** SEM and EDS mapping of KLFO@C.

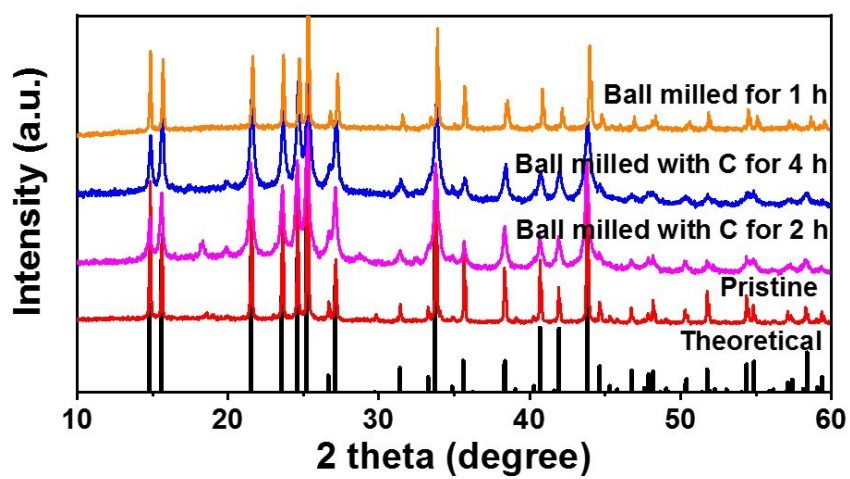

Fig. S5. Powder XRD patterns of samples at different stages.

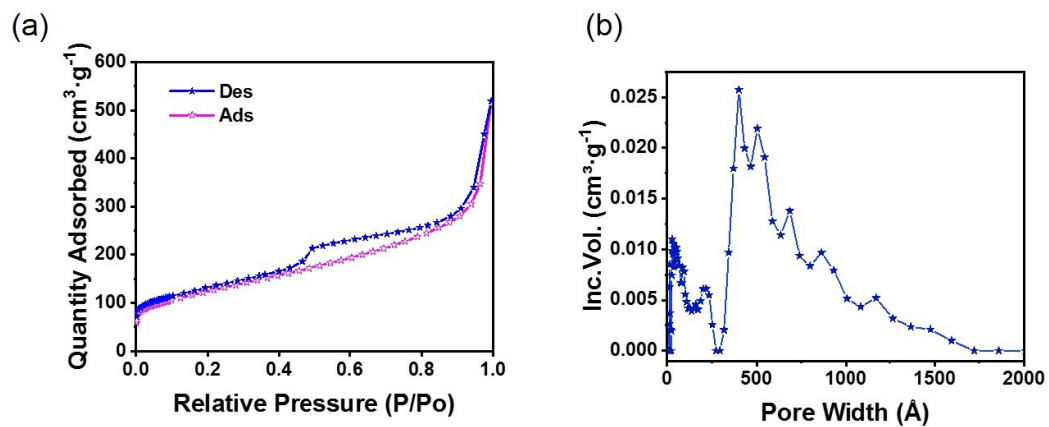

**Fig. S6.** Brunauer–Emmett–Teller surface area and pore structure of KLFO@C sample.



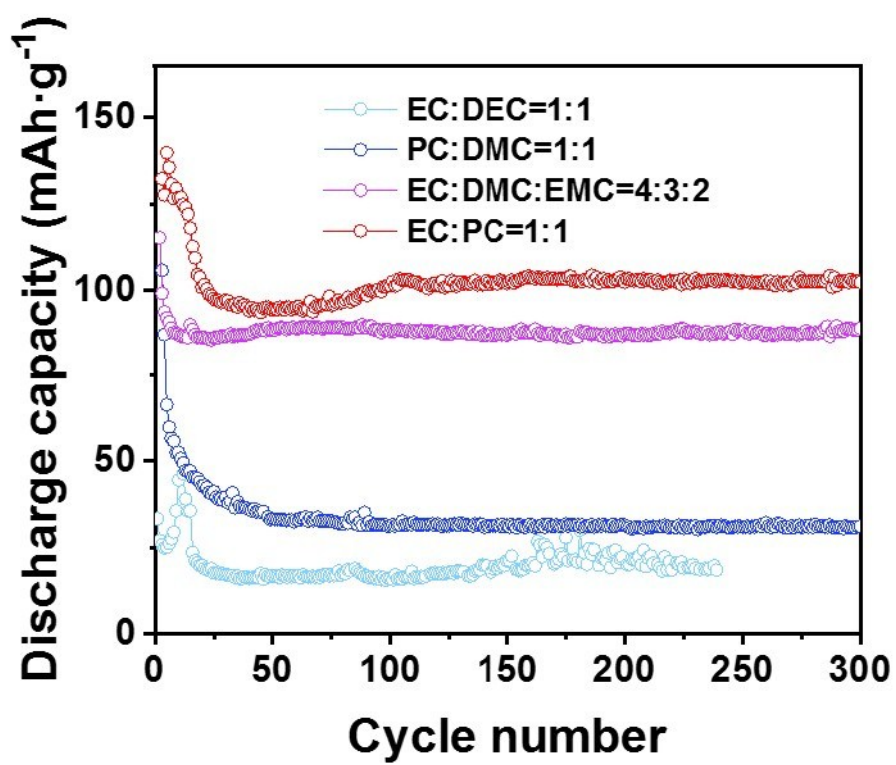

Fig. S7. Capacity retention of cells in preliminary electrolyte screening.

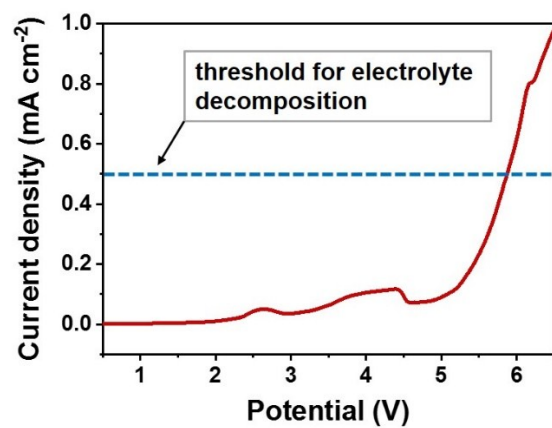

**Fig. S8.** Linear sweep voltammetry of the pure electrolyte cell.

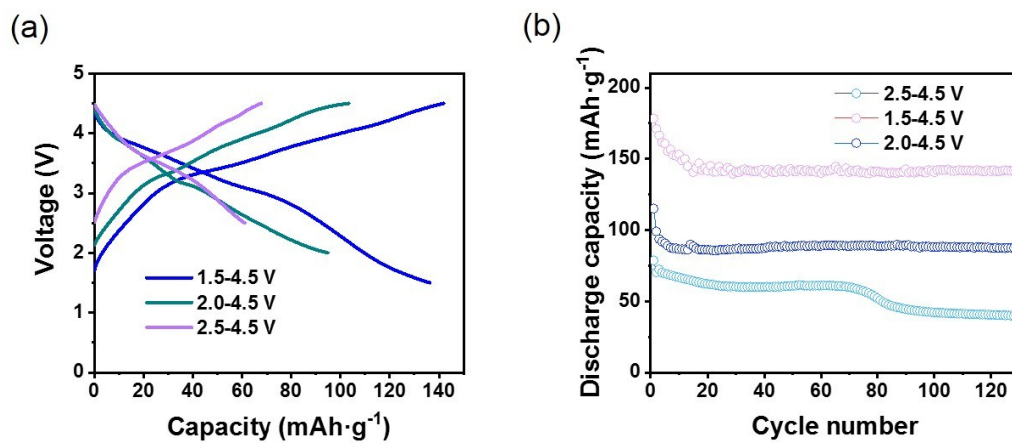

**Fig. S9.** Galvanostatic charging and discharging curves (a) and cycle stability (b) in different voltage windows of 2.5-4.5 V, 2.0-4.5 V and 1.5-4.5 V under the current density of  $120 \text{ mA g}^{-1}$ .

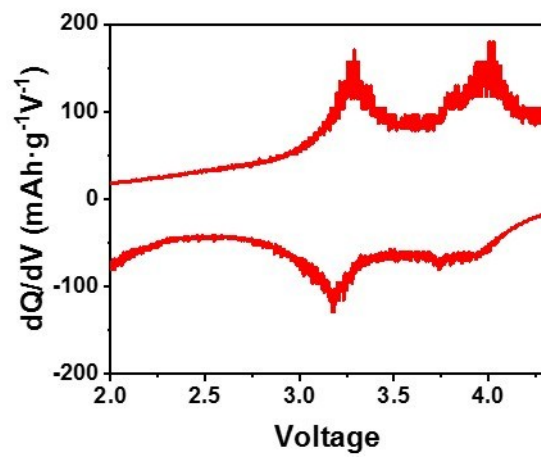

**Fig. S10.**  $dQ/dV$  curve of a cell cycled in 1.5-4.5 V under the current density of 120 mA g<sup>-1</sup>, corresponding to GCD curve in Figure 2a.

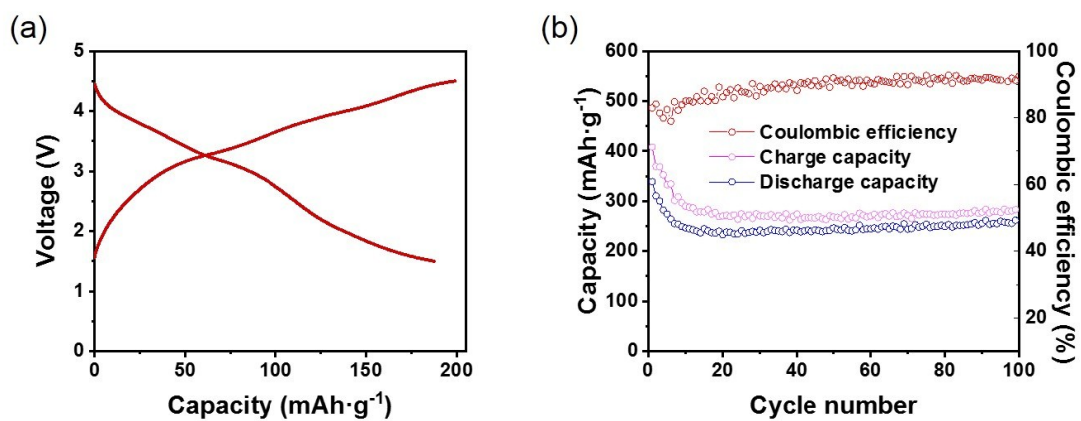

**Fig. S11.** The GCD curve and cycle stability of a cell under the current density of 25  $\text{mA g}^{-1}$ .

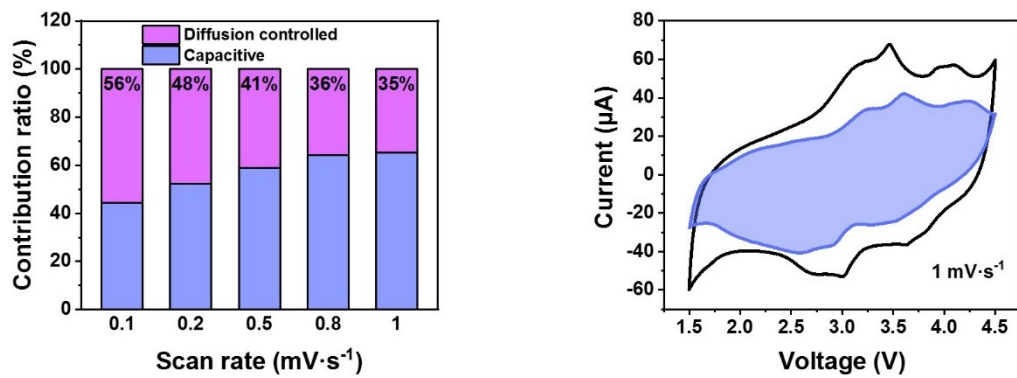

**Fig. S12. Dynamic analysis.** (a) Specific percentages of diffusion control at different scan rates. (b) Schematic illustration of capacitance-process (blue) at 1 mV s<sup>-1</sup>.

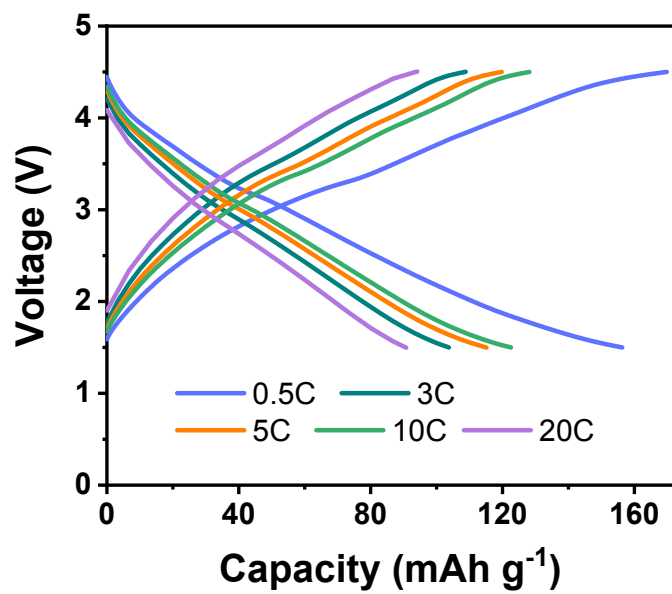

**Fig. S13.** GCD curves at different current densities. 1C = 120 mA g<sup>-1</sup>.

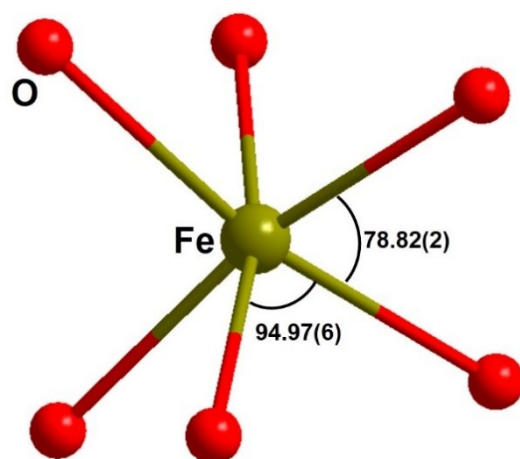

**Fig. S14.** Motif of [FeO<sub>6</sub>] octahedron with maximum and minimum bond angles highlighted.



**Table S1.** Rietveld refinement of pristine  $\text{KLi}_3\text{Fe}(\text{C}_2\text{O}_4)_3$ .

---

**Trigonal system,  $R\bar{3}c$  (No. 167), Mr = 379.83 (g/mol), Z = 6**

$a = 11.430(1) \text{ \AA}$ ,  $b = 11.430(1) \text{ \AA}$ ,  $c = 15.153(1) \text{ \AA}$ ,  $V = 1714.5(4) \text{ \AA}^3$

$R_w = 0.0786$ ,  $wR_p = 0.1027$ ,  $\chi^2 = 1.535$

---

| <b>Atom</b> | <b>x/a</b> | <b>y/b</b> | <b>z/c</b> | <b>Multiplicity</b> | <b><math>U_{\text{iso}}</math></b> |
|-------------|------------|------------|------------|---------------------|------------------------------------|
| <b>Fe</b>   | 0          | 0          | 0.25       | 6                   | 0.0288                             |
| <b>K1</b>   | 0.6667     | 0.3333     | 0.3333     | 6                   | 0.0534                             |
| <b>O1</b>   | 0.3939     | 0.3072     | 0.3141     | 36                  | 0.0394                             |
| <b>O2</b>   | 0.1851     | 0.1108     | 0.0.3193   | 36                  | 0.0128                             |
| <b>C1</b>   | 0.2972     | 0.2149     | 0.2976     | 36                  | 0.0115                             |
| <b>Li1</b>  | 0.2228     | 0.2228     | 0.25       | 18                  | 0.0456                             |

---

**Table S2.** Assignments of peaks in FTIR and Raman spectra of the pristine sample.

| Peaks number | IR           | Raman   | Band assignments                   |
|--------------|--------------|---------|------------------------------------|
| 1            | 1667(strong) |         | va (C=O)                           |
| 2            | 1631(strong) |         | vs (C-O) + v(C-C)                  |
| 3            | 1479(strong) |         | vs (C-O) + $\delta$ (O-C=O)        |
| 4            | 1425         |         | vs (C-O) + $\delta$ (O-C=O)        |
| 5            | 1345(strong) |         | vs (C-O)                           |
| 6            | 1319(strong) |         | $\delta$ (O-C=O)                   |
| 7            | 912          |         | vs (C-O) + $\delta$ (O-C=O)        |
| 8            | 860          |         | $\delta$ (O-C=O)                   |
| 9            | 804(strong)  |         | v(M-O)                             |
| 10           | 605          |         | v(M-O) + v(C-C)                    |
| 11           | 480 (strong) |         | Ring deform + $\delta$ (O-C=O)     |
| i            |              | 1719    | v (CO)                             |
| ii           |              | 1645(m) | v (CO)                             |
| iii          |              | 1625    | v (CO)                             |
| iv           |              | 1481(s) | v (C=O) stretching                 |
| v            |              | 912(m)  | v (C-C) stretching                 |
| vi           |              | 851     | $\delta$ (O-C=O) bending           |
| vii          |              | 601     | $\delta$ (O-C=O) symmetric bending |
| viii         |              | 508(m)  | v (MO ring)                        |

**Table S3.** Fitting parameters of Fe K-edge EXAFS spectrum of pristine KLFO sample.

| Path    | Coordination Number | R        | $S_0^2$ | $\Delta E_0$ (eV) | $\sigma^2$ ( $\text{\AA}^2$ ) | <i>R factor</i> |
|---------|---------------------|----------|---------|-------------------|-------------------------------|-----------------|
| Fe-O1   | 6                   | 2.12(4)  | 0.71    | 2.982             | 0.01                          | 0.019           |
| Fe-C    | 6                   | 2.87(4)  | 0.71    | 2.982             | 0.01                          |                 |
| Fe-O1-C | 12                  | 3.13(4)  | 0.71    | 2.982             | 0.01                          |                 |
| Fe-O2   | 6                   | 4.08(11) | 0.71    | 2.982             | 0.01                          |                 |
| Fe-C-O2 | 12                  | 4.09(5)  | 0.71    | 2.982             | 0.01                          |                 |

**Table S4** Quantitative analysis of the oxidation state by linear combination fitting ofFe *K*-edge XANES.

| Time                 | E (eV)  | $\Delta E$ (eV) | oxidation state | %Fe <sup>3+</sup> | %Fe <sup>2+</sup> |
|----------------------|---------|-----------------|-----------------|-------------------|-------------------|
| Ref Fe <sup>2+</sup> | 7121.80 | 0.00            | 2.000           | 0                 | 100               |
| Ref Fe <sup>3+</sup> | 7126.80 | 5.00            | 3.000           | 100               | 0                 |
| 20                   | 7122.05 | 0.25            | 2.05            | 5                 | 95                |
| 30                   | 7122.42 | 0.62            | 2.124           | 12.4              | 87.6              |
| 40                   | 7122.42 | 0.62            | 2.124           | 12.4              | 87.6              |
| 50                   | 7122.49 | 0.69            | 2.138           | 13.8              | 86.2              |
| 60                   | 7122.53 | 0.73            | 2.146           | 14.6              | 85.4              |
| 70                   | 7122.61 | 0.81            | 2.162           | 16.2              | 83.8              |
| 80                   | 7122.65 | 0.85            | 2.17            | 17                | 83                |
| 90                   | 7122.9  | 1.1             | 2.22            | 22                | 78                |
| 100                  | 7122.99 | 1.19            | 2.238           | 23.8              | 76.2              |
| 110                  | 7123.72 | 1.92            | 2.384           | 38.4              | 61.6              |
| 120                  | 7123.97 | 2.17            | 2.434           | 43.4              | 56.6              |
| 130                  | 7124.44 | 2.64            | 2.528           | 52.8              | 47.2              |
| 140                  | 7124.92 | 3.12            | 2.624           | 62.4              | 37.6              |
| 150                  | 7125.37 | 3.57            | 2.714           | 71.4              | 28.6              |
| 160                  | 7126.01 | 4.21            | 2.842           | 84.2              | 15.8              |
| 170                  | 7126.75 | 4.95            | 2.99            | 99                | 1                 |
| 180                  | 7126.59 | 4.79            | 2.958           | 95.8              | 4.2               |
| 190                  | 7125.83 | 4.03            | 2.806           | 80.6              | 19.4              |
| 200                  | 7125.69 | 3.89            | 2.778           | 77.8              | 22.2              |
| 210                  | 7125.07 | 3.27            | 2.654           | 65.4              | 34.6              |
| 220                  | 7124.43 | 2.63            | 2.526           | 52.6              | 47.4              |
| 230                  | 7124.18 | 2.38            | 2.476           | 47.6              | 52.4              |
| 240                  | 7123.47 | 1.67            | 2.334           | 33.4              | 66.6              |
| 250                  | 7123.05 | 1.25            | 2.25            | 25                | 75                |
| 260                  | 7122.96 | 1.16            | 2.232           | 23.2              | 76.8              |
| 270                  | 7122.63 | 0.83            | 2.166           | 16.6              | 83.4              |
| 280                  | 7122.62 | 0.82            | 2.164           | 16.4              | 83.6              |
| 290                  | 7122.54 | 0.74            | 2.148           | 14.8              | 85.2              |
| 300                  | 7122.5  | 0.7             | 2.14            | 14                | 86                |
| 310                  | 7122.44 | 0.64            | 2.128           | 12.8              | 87.2              |
| 320                  | 7122.4  | 0.6             | 2.12            | 12                | 88                |
| 330                  | 7122.31 | 0.51            | 2.102           | 10.2              | 89.8              |
| 340                  | 7122    | 0.2             | 2.04            | 4                 | 96                |

**Table S5.** Electrochemical performances of KLFO@C and cathode materials of recently reported for potassium-ion devices.

| Cathode material                                                                                                   | Type  | Voltage [V] | Current density (mA g <sup>-1</sup> ) | Stable capacity | Cycle number | Capacity after cycles (mA g <sup>-1</sup> ) | Ref. |
|--------------------------------------------------------------------------------------------------------------------|-------|-------------|---------------------------------------|-----------------|--------------|---------------------------------------------|------|
| P2-type K <sub>2/3</sub> Ni <sub>1/3</sub> Co <sub>1/3</sub> Te <sub>1/3</sub> O <sub>2</sub>                      | oxide | 1.25–5.0    | 6.5                                   | 30              | 25           | 30                                          | 6    |
| P2-Type K <sub>0.63</sub> Fe <sub>0.5</sub> Mn <sub>0.5</sub> O <sub>2</sub>                                       | oxide | 1.5–4.2     | 100                                   | 103             | 350          | 80                                          | 7    |
| P2-type Na <sub>0.84-x</sub> K <sub>x</sub> CoO <sub>2</sub>                                                       | oxide | 2.0–4.2     | 7.6                                   | 82              | 50           | 69                                          | 8    |
| P2-type K <sub>2</sub> Ni <sub>2</sub> TeO <sub>6</sub>                                                            | oxide | 1.3–4.7     | 6                                     | 70              | 70           | 62                                          | 9    |
| P2-Type K <sub>0.6</sub> CoO <sub>2</sub>                                                                          | oxide | 1.7–4.0     | 100                                   | 62              | 120          | 37                                          | 9    |
| P2-type K <sub>0.6</sub> CoO <sub>2</sub>                                                                          | oxide | 1.7–4.0     | 40                                    | 75              | 300          | 65                                          | 10   |
| P3-type K <sub>0.45</sub> MnO <sub>2</sub>                                                                         | oxide | 1.5–4.0     | 20                                    | 101             | 100          | 66.7                                        | 11   |
| P2-type K <sub>0.3</sub> MnO <sub>2</sub>                                                                          | oxide | 1.5–3.5     | 28                                    | 74              | 700          | 50                                          | 12   |
| P2-type K <sub>0.41</sub> CoO <sub>2</sub>                                                                         | oxide | 2.0–3.9     | 11.8                                  | 57              | 30           | 54                                          | 12   |
| P3-type K <sub>2/3</sub> CoO <sub>2</sub>                                                                          | oxide | 2.0–3.9     | 11.8                                  | 60              | 30           | 55                                          | 13   |
| P3-K <sub>0.69</sub> CrO <sub>2</sub>                                                                              | oxide | 1.5–3.8     | 100                                   | 100             | 1000         | 65                                          | 14   |
| P3-K <sub>0.8</sub> CrO <sub>2</sub>                                                                               | oxide | 1.5–3.9     | 10                                    | 90              | 300          | 50                                          | 15   |
| P3-Type K <sub>0.5</sub> MnO <sub>2</sub>                                                                          | oxide | 1.5–4.2     | 5                                     | 140             | 20           | 49                                          | 16   |
| P3-Type K <sub>0.5</sub> MnO <sub>2</sub>                                                                          | oxide | 1.5–3.9     | 5                                     | 110             | 20           | 86                                          | 17   |
| P3-K <sub>0.54</sub> [Co <sub>0.5</sub> Mn <sub>0.5</sub> ]O <sub>2</sub>                                          | oxide | 1.5–4.0     | 500                                   | 78              | 500          | 48                                          | 18   |
| P'3-type Na <sub>0.52</sub> CrO <sub>2</sub>                                                                       | oxide | 2.0–3.6     | 500                                   | 52              | 200          | 51                                          | 19   |
| O3-type KCrS <sub>2</sub>                                                                                          | oxide | 1.8–3.0     | 9                                     | 71              | 1000         | 64                                          | 20   |
| O3-type KCrO <sub>2</sub>                                                                                          | oxide | 1.5–4.0     | 10                                    | 85              | 100          | 57                                          | 21   |
| K <sub>0.37</sub> Na <sub>0.3</sub> Ni <sub>0.17</sub> Co <sub>0.17</sub> Mn <sub>0.66</sub> O <sub>2</sub>        | oxide | 2.0–4.2     | 20                                    | 86.1            | 100          | 78.8                                        | 22   |
| K <sub>0.67</sub> Ni <sub>0.17</sub> Co <sub>0.17</sub> Mn <sub>0.66</sub> O <sub>2</sub>                          | oxide | 2.0–4.3     | 20                                    | 80              | 100          | 72                                          | 23   |
| K <sub>0.7</sub> Fe <sub>0.5</sub> Mn <sub>0.5</sub> O <sub>2</sub>                                                | oxide | 1.5–4.0     | 20                                    | 178             | 45           | 125                                         | 24   |
| K <sub>1.06</sub> Mn <sub>8</sub> O <sub>16</sub> /CNT                                                             | oxide | 1.5–4.0     | 500                                   | 125             | 100          | 72.2                                        | 25   |
| V <sub>2</sub> O <sub>5</sub> ·0.6H <sub>2</sub> O                                                                 | oxide | 1.5–4.0     | 50                                    | 155             | 500          | 103                                         | 26   |
| K <sub>x</sub> V <sub>2</sub> O <sub>5</sub> ·nH <sub>2</sub> O                                                    | oxide | 2.0–4.3     | 20                                    | 226             | 50           | 167                                         | 27   |
| K <sub>0.77</sub> MnO <sub>2</sub> ·0.23H <sub>2</sub> O                                                           | oxide | 1.5–4.0     | 1000                                  | 77              | 1000         | 62                                          | 28   |
| K <sub>0.32</sub> MnO <sub>2</sub>                                                                                 | oxide | 2.0–4.5     | 100                                   | 49.2            | 100          | 36.1                                        | 29   |
| Na <sub>0.9</sub> Cr <sub>0.9</sub> Ru <sub>0.1</sub> O <sub>2</sub>                                               | oxide | 1.5–3.8     | 500                                   | 62              | 500          | 50.3                                        | 30   |
| K <sub>x</sub> MnO <sub>2</sub> ·nH <sub>2</sub> O                                                                 | oxide | 1.5–4.0     | 80                                    | 86              | 50           | 68                                          | 31   |
| K <sub>0.45</sub> Mn <sub>0.9</sub> Mg <sub>0.1</sub> O <sub>2</sub>                                               | oxide | 1.5–4.0     | 20                                    | 108             | 100          | 80.8                                        | 32   |
| K <sub>0.28</sub> MnO <sub>2</sub> ·0.15H <sub>2</sub> O                                                           | oxide | 1.4–3.6     | 152                                   | 0.1C            | 100          | 123                                         | 33   |
| AlF <sub>3</sub> @ K <sub>1.39</sub> Mn <sub>3</sub> O <sub>6</sub>                                                | oxide | 1.5–4.0     | 10                                    | 110             | 100          | 105                                         | 34   |
| K <sub>0.5</sub> V <sub>2</sub> O <sub>5</sub>                                                                     | oxide | 1.0–3.0     | 100                                   | 60              | 250          | 49                                          | 35   |
| K <sub>2</sub> V <sub>3</sub> O <sub>8</sub> /C                                                                    | oxide | 1.0–4.2     | 20                                    | 75              | 200          | 60                                          | 36   |
| V <sub>2</sub> O <sub>5</sub>                                                                                      | oxide | 2.0–4.5     | 100                                   | 77.8            | 100          | 48                                          | 37   |
| V <sub>2</sub> O <sub>5</sub> @rGO                                                                                 | oxide | 1.5–4.3     | 147                                   | 222             | 500          | 178                                         | 38   |
| V <sub>2</sub> O <sub>5</sub> @CNT                                                                                 | oxide | 1.5–3.8     | 5                                     | 150             | 50           | 80                                          | 39   |
| H <sub>2</sub> V <sub>3</sub> O <sub>8</sub>                                                                       | oxide |             | 5                                     | 168             | 100          | 126                                         | 40   |
| K <sub>0.486</sub> V <sub>2</sub> O <sub>5</sub>                                                                   | oxide | 1.5–4.2     | 20                                    | 159             | 100          | 44.3                                        | 41   |
| KFeO <sub>2</sub>                                                                                                  | oxide | 1.7–3.7     | 10                                    | 60              | 50           | 30                                          | 42   |
| KMn <sub>7/6</sub> Co <sub>0.4</sub> O <sub>16</sub>                                                               | oxide | 1.5–4.0     | 100                                   | 174             | 50           | 75                                          | 43   |
| KNi <sub>1/3</sub> Mn <sub>2/3</sub> O <sub>2</sub>                                                                | oxide | 1.5–4.5     | 86                                    | 82              | 200          | 73                                          | 44   |
| K <sub>0.3</sub> Ti <sub>0.75</sub> Fe <sub>0.25</sub> [Fe(CN) <sub>6</sub> ] <sub>0.95</sub> ·2.8H <sub>2</sub> O | PBAs  | 1.0–4.5     | 100                                   | 113             | 100          | 73.1                                        | 45   |
| K <sub>0.220</sub> Fe[Fe(CN) <sub>6</sub> ] <sub>0.805</sub> ·4.01H <sub>2</sub> O                                 | PBAs  | 2.0–4.0     | 50                                    | 74.5            | 50           | 73.2                                        | 46   |
| K <sub>1.6</sub> Mn[Fe(CN) <sub>6</sub> ] <sub>0.96</sub> ·0.27H <sub>2</sub> O                                    | PBAs  | 3.2–4.3     | 50                                    | 110             | 30           | 86                                          | 47   |
| K <sub>1.70</sub> Mn[Fe(CN) <sub>6</sub> ] <sub>0.90</sub> ·1.10H <sub>2</sub> O                                   | PBAs  | 2.5–4.6     | 156                                   | 110             | 100          | 100                                         | 48   |
| K <sub>1.75</sub> Mn[Fe(CN) <sub>6</sub> ] <sub>0.93</sub> ·0.16H <sub>2</sub> O                                   | PBAs  | 2.0–4.5     | 30                                    | 120             | 100          | 116                                         | 47   |
| K <sub>1.89</sub> Mn[Fe(CN) <sub>6</sub> ] <sub>0.92</sub> ·0.75H <sub>2</sub> O                                   | PBAs  | 2.5–4.6     | 0.2C                                  | 142.4           |              |                                             | 49   |
| K <sub>1.64</sub> Fe[Fe(CN) <sub>6</sub> ] <sub>0.89</sub> ·0.15H <sub>2</sub> O                                   | PBAs  | 2.0–4.5     | 30                                    | 122             | 100          | 110                                         | 50   |
| K <sub>1.88</sub> Zn <sub>2.88</sub> [Fe(CN) <sub>6</sub> ] <sub>2</sub> (H <sub>2</sub> O) <sub>5</sub>           | PBAs  | 3.4–4.15    | 14                                    | 55.6            | 100          | 52.8                                        | 51   |

|                                                                        |                                   |                |            |            |             |            |             |
|------------------------------------------------------------------------|-----------------------------------|----------------|------------|------------|-------------|------------|-------------|
| $K_{1.92}Fe[Fe(CN)_6]_{0.94} \cdot 0.5H_2O$                            | PBA <sub>s</sub>                  | 2.0–4.3        | 13         | 133        | 200         | 123        | 52          |
| $K_{1.7}Fe[Fe(CN)_6]_{0.9}$                                            | PBA <sub>s</sub>                  | 2.0–4.5        | 100        | 120        | 300         | 78         | 53          |
| $K_{1.59}Fe_{2.20}(CN)_6$                                              | PBA <sub>s</sub>                  | 2.25–4.25      | 77.5       | 148        | 1000        | 99         | 53          |
| $K_{1.68}Fe_{1.09}[Fe(CN)_6] \cdot 2.1H_2O$                            | PBA <sub>s</sub>                  | 2.0–4.5        | 20         | 110        | 100         | 81         | 53          |
| $K_{1.55}Co_{0.88}[Fe(CN)_6] \cdot 3.2H_2O$                            | PBA <sub>s</sub>                  | 2.0–4.5        | 20         | 60         | 15          | 38.4       | 53          |
| $K_{1.51}Ni_{1.05}[Fe(CN)_6] \cdot 2.1H_2O$                            | PBA <sub>s</sub>                  | 2.0–4.5        | 20         | 63         | 15          | 58.6       | 54          |
| $K_{1.40}Cu_{0.93}[Fe(CN)_6] \cdot 2.1H_2O$                            | PBA <sub>s</sub>                  | 2.0–4.5        | 20         | 36         | 15          | 30         | 55          |
| $KFe[Fe(CN)_6]$                                                        | PBA <sub>s</sub>                  | 2.0–4.5        | 100        | 90.7       | 1000        | 73         | 56          |
| $KFe[Fe(CN)_6]$                                                        | PBA <sub>s</sub>                  | 0.8–2.1        | 2000       | 72         | 50          | 58         | 57          |
| $KFe^{3+}[Fe^{2+}(CN)_6]$                                              | PBA <sub>s</sub>                  | 2.5–4.2        | 8.7        | 78         | 500         | 69         | 58          |
| $K_{1.85}Mn[Fe(CN)_6]_{0.98} \cdot 0.7H_2O$                            | PBA <sub>s</sub>                  | 2.0–4.5        | 15         | 126        | 120         | 120.1      | 59          |
| $K_{1.81}Mn[Fe(CN)_6]_{0.97} \cdot 0.086H_2O$                          | PBA <sub>s</sub> PBA <sub>s</sub> | 2.0–4.5        | 10         | 57         | 1000        | 50         | 60          |
| $K_{1.4}Fe_4[Fe(CN)_6]_3$                                              | PBA <sub>s</sub>                  | 2.0–4.0        | 50         | 72         | 40          | 57.6       | 61          |
| $K_{1.62}Fe[Fe(CN)_6]_{0.92} \cdot 0.33H_2O$                           | PBA <sub>s</sub>                  | 2.5–4.5        | 50         | 120.9      | 100         | 117        | 62          |
| 5% Ni-doped PB                                                         | PBA <sub>s</sub>                  | 2.0–4.2        | 100        | 135        | 300         | 112        | 63          |
| RGO@PB@SSM                                                             | PBA <sub>s</sub>                  | 2.0–4.0        | 50         | 61.4       | 305         | 46         | 64          |
| KHCF@PPy                                                               | PBA <sub>s</sub>                  | 2.0–4.2        | 50         | 88.8       | 500         | 77.1       | 65          |
| $K_2FeFe(CN)_6$                                                        | PBA <sub>s</sub>                  | 2.0–4.3        | 20         | 110        | 100         | 89         | 66          |
| $FeFe(CN)_6$                                                           | PBA <sub>s</sub>                  | 0.0–0.975      | 111        | 140        | 20          | 119        | 67          |
| $K_4Fe(CN)_6$                                                          | PBA <sub>s</sub>                  | 2.0–3.8        | 20         | 65.5       | 400         | 48.8       | 68          |
| $FeFe(CN)_6$                                                           | PBA <sub>s</sub>                  | 1.5–4.0        | 625        | 100        | 500         | 93         | 69          |
| <i>o</i> -Na <sub>2</sub> C <sub>6</sub> H <sub>2</sub> O <sub>6</sub> | Organic                           | 1.0–3.0        | 25         | 98.8       | 100         | 65.1       | 70          |
| <i>p</i> -Na <sub>2</sub> C <sub>6</sub> H <sub>2</sub> O <sub>6</sub> | Organic                           | 1.0–3.0        | 25         | 228.5      | 50          | 190        | 71          |
| CuTCNQ                                                                 | Organic                           | 2.0–4.0        | 50         | 206        | 50          | 170        | 72          |
| HAT-containing polymer                                                 | Organic                           | 0.9–3.4        | 10000      | 150        | 4500        | 150        | 73          |
| PTCDA                                                                  | Organic                           | 1.5–3.5        | 50         | 117        | 200         | 90         | 74          |
| PTCDA                                                                  | Organic                           | 1.2–3.2        | 10         | 87         | 300         | 63         | 75          |
| PTCDA                                                                  | Organic                           | 1.5–3.5        | 1000       | 113        | 1000        | 98         | 76          |
| AQDS                                                                   | Organic                           | 1.4–3.0        | 13         | 95         | 100         | 78         | 77          |
| AQDS                                                                   | Organic                           | 1.4–3.0        | 390        | 80         | 1000        | 64         | 78          |
| PAQS                                                                   | Organic                           | 1.5–3.4        | 200        | 106        | 200         | 68         | 79          |
| PTPAn                                                                  | Organic                           | 2.0–4.0        | 100        | 75         | 60          | 71         | 80          |
| PVK                                                                    | Organic                           | 2.0–4.7        | 500        | 104        | 400         | 73         | 81          |
| PAN                                                                    | Organic                           | 2.0–4.0        | 50         | 100        | 100         | 98         | 82          |
| SR                                                                     | Organic                           | 1.5–3.8        | 125        | 118        | 100         | 82         | 83          |
| PQ-1, 5                                                                | Organic                           | 1.2–3.2 V      | 250        | 115        | 200         | 105        | 84          |
| PI-CMP                                                                 | Organic                           | 1.5–3.5 V      | 1000       | 109        | 1000        | 80.8       | 85          |
| PPTS                                                                   | Organic                           | 0.8–3.2        | 100        | 282.3      | -           | -          | 86          |
| <i>p</i> -DPPZ                                                         | Organic                           | 2.5–4.5        | 162        | 200        | 1000        | 120        | 87          |
| Na <sub>2</sub> AQ <sub>26</sub> DS                                    | Organic                           | 1.5–3.7        | 100        | 105        | 200         | 105        | 88          |
| OHTAP                                                                  | Organic                           | 1.1–2.8        | 0.1C       | 220        | 50          | 162        | 89          |
| Polydiaminoanthraquinone                                               | Organic                           | 1.2–3.2        | 250        | 120        | 200         | 105        | 90          |
| PI@G                                                                   | Organic                           | 1.4–3.5        | 100        | 142        | 500         | 118        | 91          |
| PTCDI                                                                  | Organic                           | 1.4–3.8        | 100        | 157        | 600         | 120        | 92          |
| $K_2[(VO)_2(HPO_4)_2(C_2O_4)]$                                         | Polyanion                         | 2.0–4.6        | 22         | 65         | 200         | 54         | 93          |
| $VOPO_4 \cdot 2H_2O$                                                   | Polyanion                         | -0.2–1.3       | 27         | 88.3       | 100         | 76         | 93          |
| $FePO_4$                                                               | Polyanion                         | 1.5–3.5        | 5          | 156        | 50          | 134        | 94          |
| $K_3V_2(PO_4)_3/C$                                                     | Polyanion                         | 2.5–4.3        | 20         | 55         | 100         | 52         | 95          |
| $KTi_2(PO_4)_3/C$                                                      | Polyanion                         | 1.2–2.8        | 64         | 75.6       | 100         | 82         | 96          |
| $KVPO_4F$                                                              | Polyanion                         | 2.0–4.8        | 6.65       | 72         | 50          | 65         | 96          |
| $KVOPO_4$                                                              | Polyanion                         | 2.0–4.8        | 6.65       | 73         | 50          | 69         | 96          |
| $KVOPO_4$                                                              | Polyanion                         |                | 24         | 115        | 100         | 60         | 97          |
| $KVPO_4F$                                                              | Polyanion                         | 3.0–5.0        | 5          | 100        | 30          | 78         | 98          |
| $KVP_2O_7$                                                             | Polyanion                         | 2.0–5.0        | 25         | 60         | 100         | 51         | 99          |
| $KMoP_2O_7$                                                            | Polyanion                         | 2.0–5.0        | 1C         | 25         | -           | -          | 100         |
| $KTiP_2O_7$                                                            | Polyanion                         | 2.0–5.0        | 1C         | 22         | -           | -          | 101         |
| $K_3V_2(PO_4)_3$                                                       | Polyanion                         | 0.01–3.0       | 25         | 88         | 500         | 78         | 102         |
| $K_3V_2(PO_4)_2F_3$                                                    | Polyanion                         | 2.0–4.5        | 10         | 101        | 100         | 98         | 103         |
| $K(Mn,Co)F_3$                                                          | Others                            | 1.2–4.2        | 40         | 132.6      | 60          | 103.4      | 104         |
| $I_2$                                                                  | Others                            | 1.9–3.5        | 100        | 115        | 500         | 82         | 105         |
| <b>KLFO@C</b>                                                          | <b>Polyanion</b>                  | <b>1.5–4.5</b> | <b>120</b> | <b>140</b> | <b>5000</b> | <b>130</b> | <b>This</b> |

## References

- (1) Masese, T. *et al.* A high voltage honeycomb layered cathode framework for rechargeable potassium-ion battery: P2-type  $K_{2/3}Ni_{1/3}Co_{1/3}Te_{1/3}O_2$ . *Chem. Commun.* **55**, 985-988 (2019).
- (2) Deng, T. *et al.* Layered P2-Type  $K_{0.65}Fe_{0.5}Mn_{0.5}O_2$  Microspheres as Superior Cathode for High-Energy Potassium-Ion Batteries. *Adv. Funct. Mater.* **28**, 1800219 (2018).
- (3) Sada, K., Senthilkumar, B. & Barpanda, P. Electrochemical potassium-ion intercalation in  $Na_xCoO_2$ : a novel cathode material for potassium-ion batteries. *Chem. Commun.* **53**, 8588-8591 (2017).
- (4) Masese, T. *et al.* Rechargeable potassium-ion batteries with honeycomb-layered tellurates as high voltage cathodes and fast potassium-ion conductors. *Nat. Commun.* **9**, 3823 (2018).
- (5) Kim, H. *et al.* K-Ion Batteries Based on a P2-Type  $K_{0.6}CoO_2$  Cathode. *Adv. Energy Mater.* **7**, 1700098 (2017).
- (6) Deng, T. *et al.* Self-Templated Formation of P2-type  $K_{0.6}CoO_2$  Microspheres for High Reversible Potassium-Ion Batteries. *Nano Lett.* **18**, 1522-1529 (2018).
- (7) Liu, C.-L., Luo, S.-H., Huang, H.-B., Zhai, Y.-C. & Wang, Z.-W. Layered potassium-deficient P2- and P3-type cathode materials  $K_xMnO_2$  for K-ion batteries. *Chem. Eng. J.* **356**, 53-59 (2019).
- (8) Vaalma, C., Giffin, G. A., Buchholz, D. & Passerini, S. Non-Aqueous K-Ion Battery Based on Layered  $K_{0.3}MnO_2$  and Hard Carbon/Carbon Black. *J. Electrochem. Soc.* **163**, A1295-A1299 (2016).
- (9) Hironaka, Y., Kubota, K. & Komaba, S. P2- and P3- $K_xCoO_2$  as an electrochemical potassium intercalation host. *Chem. Commun.* **53**, 3693-3696 (2017).
- (10) Hwang, J.-Y., Kim, J., Yu, T.-Y., Myung, S.-T. & Sun, Y.-K. Development of P3- $K_{0.69}CrO_2$  as an ultra-high-performance cathode material for K-ion batteries. *Energy Environ. Sci.* **11**, 2821-2827 (2018).
- (11) Naveen, N., Han, S., Singh, S., Ahn, D., Sohn, K.-S., Pyo, M., Highly stable P3- $K_{0.8}CrO_2$  cathode with limited dimensional changes for potassium ion batteries. *J. Power Sources* **430**, 137-144 (2019).
- (12) Kim, H. *et al.* Investigation of Potassium Storage in Layered P3-Type  $K_{0.5}MnO_2$  Cathode. *Adv. Mater.* **29** 1702480 (2017).
- (13) Choi, J. *et al.*  $K_{0.54}[Co_{0.5}Mn_{0.5}]O_2$ : New cathode with high power capability for potassium-ion batteries. *Nano Energy* **61**, 284-294 (2019).
- (14) Naveen, N. *et al.* Reversible  $K^+$ -Insertion/Deinsertion and Concomitant  $Na^+$ -Redistribution in P3- $Na_{0.52}CrO_2$  for High-Performance Potassium-Ion Battery Cathodes. *Chem. Mater.* **30**, 2049-2057 (2018).

- (15) Naveen, N. *et al.* KCrS<sub>2</sub> Cathode with Considerable Cyclability and High Rate Performance: The First K<sup>+</sup> Stoichiometric Layered Compound for Potassium-Ion Batteries. *Small* **14**, 1803495 (2018).
- (16) Kim, H. *et al.* Stoichiometric Layered Potassium Transition Metal Oxide for Rechargeable Potassium Batteries. *Chem. Mater.* **30**, 6532-6539 (2018).
- (17) Liu, C.-L., Luo, S.-H., Huang, H.-B., Zhai, Y.-C. & Wang, Z.-W. Influence of Na-substitution on the structure and electrochemical properties of layered oxides K<sub>0.67</sub>Ni<sub>0.17</sub>Co<sub>0.17</sub>Mn<sub>0.66</sub>O<sub>2</sub> cathode materials. *Electrochim. Acta* **286**, 114-122 (2018).
- (18) Liu, C. *et al.* K<sub>0.67</sub>Ni<sub>0.17</sub>Co<sub>0.17</sub>Mn<sub>0.66</sub>O<sub>2</sub>: A cathode material for potassium-ion battery. *Electrochem. Commun.* **82**, 150-154 (2017).
- (19) Wang, X. *et al.* Earth Abundant Fe/Mn-Based Layered Oxide Interconnected Nanowires for Advanced K-Ion Full Batteries. *Nano Lett.* **17**, 544-550 (2017).
- (20) Chong, S. *et al.* Cryptomelane-type MnO<sub>2</sub>/carbon nanotube hybrids as bifunctional electrode material for high capacity potassium-ion full batteries. *Nano Energy* **54**, 106-115 (2018).
- (21) Tian, B., Tang, W., Su, C. & Li, Y. Reticular V<sub>2</sub>O<sub>5</sub>·0.6H<sub>2</sub>O Xerogel as Cathode for Rechargeable Potassium Ion Batteries. *ACS Appl. Mater. Interfaces* **10**, 642-650 (2018).
- (22) Clites, M., Hart, J. L., Taheri, M. L. & Pomerantseva, E. Chemically Preintercalated Bilayered K<sub>x</sub>V<sub>2</sub>O<sub>5</sub>·nH<sub>2</sub>O Nanobelts as a High-Performing Cathode Material for K-Ion Batteries. *ACS Energy Lett.* **3**, 562-567 (2018).
- (23) Lin, B. *et al.* Birnessite Nanosheet Arrays with High K Content as a High-Capacity and Ultrastable Cathode for K-Ion Batteries. *Adv. Mater.* **31**, 1900060 (2019).
- (24) Chong, S. *et al.* Mn-based layered oxide microspheres assembled by ultrathin nanosheets as cathode material for potassium-ion batteries. *Electrochim. Acta* **293**, 299-306 (2019).
- (25) Zhang, H. *et al.* Enhanced K-ion kinetics in a layered cathode for potassium ion batteries. *Chem. Commun.* DOI:10.1039/c9cc03156a (2019).
- (26) Gao, A. *et al.* K-Birnessite Electrode Obtained by Ion Exchange for Potassium-Ion Batteries: Insight into the Concerted Ionic Diffusion and K Storage Mechanism. *Adv. Energy Mater.* **9**, 1802739 (2019).
- (27) Liu, C.-L., Luo, S., Huang, H., Zhai, Y., & Wang, Z., Low-Cost Layered K<sub>0.45</sub>Mn<sub>0.9</sub>Mg<sub>0.1</sub>O<sub>2</sub> as a High-Performance Cathode Material for K-Ion Batteries. *ChemElectroChem* **6**, 2308–2315 (2019).
- (28) Jo, J., Hwang, J.Y., Choi, J., Sun, Y.-K., & Myung, S.-T., Layered K<sub>0.28</sub>MnO<sub>2</sub>·0.15H<sub>2</sub>O as a Cathode Material for Potassium-Ion Intercalation, *ACS Appl. Mater. Interfaces* DOI: 10.1021/acsami.9b18540.(2019)



- (29) Zhao, S., Yan, K., Munroe, P., Sun, B. & Wang, G. Construction of Hierarchical  $K_{1.39}Mn_3O_6$  Spheres via  $AlF_3$  Coating for High-Performance Potassium-Ion Batteries. *Adv. Energy Mater.* **9**, 1803757 (2019).
- (30) Deng, L. *et al.* Layered Potassium Vanadate  $K_{0.5}V_2O_5$  as a Cathode Material for Nonaqueous Potassium Ion Batteries. *Adv. Funct. Mater.* **28**, 1800670 (2018).
- (31) Jo, J. *et al.* Potassium vanadate as a new cathode material for potassium-ion batteries. *J. Power Sources* **432**, 24-29 (2019).
- (32) Zhu, Y.-H. *et al.* Reconstructed Orthorhombic  $V_2O_5$  Polyhedra for Fast Ion Diffusion in K-Ion Batteries. *Chem* **5**, 168-179 (2019).
- (33) Vishnuprakash, P., Nithya, C. & Premalatha, M. Exploration of  $V_2O_5$  nanorod@rGO heterostructure as potential cathode material for potassium-ion batteries. *Electrochim. Acta* **309**, 234-241 (2019).
- (34) Yuan, K. *et al.* Prepotassiated  $V_2O_5$  as the Cathode Material for High-Voltage Potassium-Ion Batteries. *Energy Technol.* 1900796 (2019).
- (35) Mohadese, R., Jongwook, W. H., & Hong, S.-T., High Potassium Storage Capability of  $H_2V_3O_8$  in a NonAqueous Electrolyte, *ChemistrySelect*, **4**, 11711–11717 (2019).
- (36) Ye, F., Lu, D., Gui, X., Wang, T., Zhuang, X., Luo, W., Huang, Y. Atomic layer deposition of core-shell structured  $V_2O_5$ @CNT sponge as cathode for potassium ion batteries. *J. Materiomics* **5**, 344-349 (2019).
- (37) Han, S., Park, W., Sohn, K.-S. & Pyo, M.,  $KFeO_2$  with corner-shared  $FeO_4$  frameworks as a new type of cathode material in potassium-ion batteries. *J Solid State Electrochem* **23**, 3135–3143 (2019).
- (38) Tai, Z. *et al.*  $KMn_{7.6}Co_{0.4}O_{16}$  nano-rod clusters with a high discharge specific capacity as cathode materials for potassium-ion batteries, *Sus.EngeryFuels* 2019, 10.1039/C8SE00550H.
- (39) Nathan, M., Naveen, N., Park, W., Sohn, K.-S., Pyo, M., Fast chargeable  $P2-K_{-2/3}[Ni_{1/3}Mn_{2/3}]O_2$  for potassium ion battery cathodes. *J. Power Sources* **438**, 226992 (2019).
- (40) Luo, Y. *et al.* Potassium titanium hexacyanoferrate as a cathode material for potassium-ion batteries. *J. Phys. Chem. Solids* **122**, 31-35 (2018).
- (41) Zhang, C. *et al.* Potassium Prussian Blue Nanoparticles: A Low-Cost Cathode Material for Potassium-Ion Batteries. *Adv. Funct. Mater.* **27**, 1604307 (2017).
- (42) Jiang, X., Zhang, T., Yang, L., Li, G. & Lee, J. Y. A Fe/Mn-Based Prussian Blue Analogue as a K-Rich Cathode Material for Potassium-Ion Batteries. *ChemElectroChem* **4**, 2237-2242 (2017).
- (43) Xue, L. *et al.* Low-Cost High-Energy Potassium Cathode. *J Am. Chem. Soc.* **139**, 2164-2167 (2017).

- (44) Bie, X., Kubota, K., Hosaka, T., Chihara, K. & Komaba, S. A novel K-ion battery: hexacyanoferrate(ii)/graphite cell. *J. Mater. Chem. A* **5**, 4325-4330 (2017).
- (45) Xue, L. G., Li, Y. T., Gao, H. C., Zhou, W. D., Lu, X. J. Kaveevivitchai, W., Manthiram, A. & Goodenough, J.B., Low-cost high-energy potassium cathode, *J. Am. Chem. Soc.* **139**, 2164–2167 (2017).
- (46) Heo, J. W., Chae, M. S., Hyoung, J. & Hong, S. T. Rhombohedral Potassium-Zinc Hexacyanoferrate as a Cathode Material for Nonaqueous Potassium-Ion Batteries. *Inorg. Chem.* **58**, 3065-3072 (2019).
- (47) Liao, J. *et al.* A potassium-rich iron hexacyanoferrate/dipotassium terephthalate@carbon nanotube composite used for K-ion full-cells with an optimized electrolyte. *J. Mater. Chem. A* **5**, 19017-19024 (2017).
- (48) He, G. & Nazar, L. F. Crystallite Size Control of Prussian White Analogues for Nonaqueous Potassium-Ion Batteries. *ACS Energy Lett.* **2**, 1122-1127 (2017).
- (49) Piernas-Muñoz, M. J., Castillo-Martínez, E., Bondarchuk, O., Armand, M. & Rojo, T. Higher voltage plateau cubic Prussian White for Na-ion batteries. *J. Power Sources* **324**, 766-773 (2016).
- (50) He, G., Nazar, L.F. Crystallite size control of Prussian white analogues for nonaqueous potassium-ion batteries, *ACS Energy Lett* **5**, 1122–1127 (2017).
- (51) Chong, S. *et al.* Potassium ferrous ferricyanide nanoparticles as a high capacity and ultralong life cathode material for nonaqueous potassium-ion batteries. *J. Mater. Chem. A* **5**, 22465-22471 (2017).
- (52) Wang, J. *et al.* A bi-functional device for self-powered electrochromic window and self-rechargeable transparent battery applications. *Nat. Commun.* **5**, 4921 (2014).
- (53) Eftekhari, A. Potassium secondary cell based on Prussian blue cathode. *J. Power Sources* **126**, 221-228 (2004).
- (54) Sun, Y., Liu, C., Xie, J., Zhuang, D., Zheng W. & Zhao, X. Potassium manganese hexacyanoferrate/grapheme as a high-performance cathode for potassium-ion batteries. *New J. Chem.* **43**, 11618 (2019).
- (55) Chong, S., Wu, Y., Guo, S., Liu, Y., Cao, G., Potassium nickel hexacyanoferrate as cathode for high voltage and ultralong life potassium-ion batteries. *Energy Storage Materials* **22**, 120–127 (2019).
- (56) Qin, M., Ren, W., Meng, J., Wang, X., Yao, X., Ke, Y., Li, Q. & Mai, L. Realizing Superior Prussian Blue Positive Electrode for Potassium Storage via Ultrathin Nanosheet Assembly. *ACS Sustainable Chem. Eng.* **7**, 11564-11570 (2019).
- (57) Dong, J., Lei, Y., Han, D., Wang, H., Zhai, D., Li B., & Kang F., Utilizing an autogenously protective atmosphere to synthesize a Prussian white cathode with ultrahigh capacity-retention for potassium-ion batteries. *Chem. Commun.* **55**, 12555 (2019).

- (58) Huang, B., Liu, Y., Lu, Z., Shen, M., Zhou, J., Ren, J., Li, X. & Liao, S. Prussian Blue [K<sub>2</sub>FeFe(CN)<sub>6</sub>] Doped with Nickel as a Superior Cathode: An Efficient Strategy To Enhance Potassium Storage Performance. *ACS Sustainable Chem. Eng.* **7**, 16659-16667 (2019).
- (59) Zhu, Y. H. *et al.* Transformation of Rusty Stainless-Steel Meshes into Stable, Low-Cost, and Binder-Free Cathodes for High-Performance Potassium-Ion Batteries. *Angew. Chem. Int. Ed.* **56**, 7881-7885 (2017).
- (60) Xue, Q. *et al.* Polypyrrole-Modified Prussian Blue Cathode Material for Potassium Ion Batteries via In Situ Polymerization Coating. *ACS Appl. Mater. Interfaces* **11**, 22339-22345 (2019).
- (61) Wu, X., Jian, Z., Li, Z. & Ji, X. Prussian white analogues as promising cathode for non-aqueous potassium-ion batteries. *Electrochem. Commun.* **77**, 54-57 (2017).
- (62) Padigi, P. *et al.* Prussian Green: A High Rate Capacity Cathode for Potassium Ion Batteries. *Electrochim. Acta* **166**, 32-39 (2015).
- (63) Pei, Y., Mu, C., Li, H., Li, F. & Chen J. Low-Cost K<sub>4</sub>Fe(CN)<sub>6</sub> as a High-Voltage Cathode for Potassium-Ion Batteries. *ChemSusChem* **11**, 1285-1289 (2018).
- (64) Shadiké, Z. *et al.* Long life and high-rate Berlin green FeFe(CN)<sub>6</sub> cathode material for a non-aqueous potassium-ion battery. *J. Mater. Chem. A* **5**, 6393-6398 (2017).
- (65) Chen, L. *et al.* Ortho-di-sodium salts of tetrahydroxyquinone as a novel electrode for lithium-ion and potassium-ion batteries. *Electrochim. Acta* **294**, 46-52 (2019).
- (66) Chen, L. & Zhao, Y. Exploration of *p*-Na<sub>2</sub>C<sub>6</sub>H<sub>2</sub>O<sub>6</sub>-based organic electrode materials for sodium-ion and potassium-ion batteries. *Mater. Lett.* **243**, 69-72 (2019).
- (67) Ma, J. *et al.* Endowing CuTCNQ with a new role: a high-capacity cathode for K-ion batteries. *Chem. Commun.* **54**, 5578-5581 (2018).
- (68) Kapaev, R., Zhidkov, I., Kurmaev, E., Stevenson K. & Troshin, P. Hexaazatriphenylene-based polymer cathode for fast and stable lithium-, sodium- and potassium ion batteries. *J. Mater. Chem. A* **7**, 22596 (2019).
- (69) Chen, Y. *et al.* Organic electrode for non-aqueous potassium-ion batteries. *Nano Energy* **18**, 205-211 (2015).
- (70) Xing, Z. *et al.* A perylene anhydride crystal as a reversible electrode for K-ion batteries. *Energy Storage Mater.* **2**, 63-68 (2016).
- (71) Fan, L., Ma, R., Wang, J., Yang, H. & Lu, B. An Ultrafast and Highly Stable Potassium-Organic Battery. *Adv. Mater.* **30**, 1805486 (2018).
- (72) Zhao, J., Yang, J., Sun, P. & Xu, Y. Sodium sulfonate groups substituted anthraquinone as an organic cathode for potassium batteries. *Electrochem. Commun.* **86**, 34-37 (2018).

- (73) Li, B. *et al.* Electrolyte-Regulated Solid-Electrolyte Interphase Enables Long Cycle Life Performance in Organic Cathodes for Potassium-Ion Batteries. *Adv. Funct. Mater.* **29**, 1807137 (2018).
- (74) Jian, Z., Liang, Y., Rodríguez-Pérez, I. A., Yao, Y. & Ji, X. Poly(anthraquinonyl sulfide) cathode for potassium-ion batteries. *Electrochem. Commun.* **71**, 5-8 (2016).
- (75) Fan, L., Liu, Q., Xu, Z. & Lu, B. An Organic Cathode for Potassium Dual-Ion Full Battery. *ACS Energy Lett.* **2**, 1614-1620 (2017).
- (76) Li, C. *et al.* Poly(N-vinylcarbazole) as an advanced organic cathode for potassium-ion-based dual-ion battery. *Electrochim. Acta* **297**, 850-855 (2019).
- (77) Gao, H., Xue, L., Xin, S. & Goodenough, J. B. A High-Energy-Density Potassium Battery with a Polymer-Gel Electrolyte and a Polyaniline Cathode. *Angew. Chem. Int. Ed.* **57**, 5449-5453 (2018).
- (78) Ding, Y. *et al.* A Liquid-Metal-Enabled Versatile Organic Alkali-Ion Battery. *Adv. Mater.* **31**, 1806956 (2019).
- (79) Zhou, M. *et al.* Polydiaminoanthraquinones with tunable redox properties as high performance organic cathodes for K-ion batteries. *Chem. Commun.* **55**, 6054-6057 (2019).
- (80) Tian, B. *et al.* Carbonyl-based polyimide and polyquinoneimide for potassium-ion batteries. *J. Mater. Chem. A* **7**, 9997-10003 (2019).
- (81) Tang, M., Wu, Y.C., Chen, Y., Jiang, C., Zhu, S.L., Zhuo, S.M. & Wang, C.L. An organic cathode with high capacities for fast-charge potassium-ion batteries, *J. Mater. Chem.* **7**, 486-492 (2019).
- (82) Obrezkov, F. *et al.* High-Energy and High-Power-Density Potassium Ion Batteries Using Dihydrophenazine-Based Polymer as Active Cathode Material. *J. Phys. Chem. Lett.* **10**, 5440-5445 (2019).
- (83) Li, D., Tang, W., Wang, C., Fan, C. A polyanionic organic cathode for highly efficient K-ion full batteries, *Electrochem. Commun.* **105**, 106509 (2019).
- (84) Slesarenko, A. *et al.* New tetraazapentacene-based redox-active material as a promising high-capacity organic cathode for lithium and potassium batteries. *J. Power Sources* **435**, 226724 (2019).
- (85) Zhou, M. *et al.* Polydiaminoanthraquinones with tunable redox properties as high performance organic cathodes for K-ion batteries. *Chem. Commun.* **55**, 6054 (2019).
- (86) Hu, Y. *et al.* Rational Design of a Polyimide Cathode for a Stable and High-Rate Potassium-Ion Battery, *ACS Appl. Mater. Interfaces* **11**, 42078-42085 (2019).
- (87) Liao, J. *et al.* A vanadium-based metal-organic phosphate framework material  $K_2[(VO)_2(HPO_4)_2(C_2O_4)]$  as a cathode for potassium-ion batteries. *Chem. Commun.* **55**, 659-662 (2019).

- (88) Hyoung, J., Heo, J. W., Chae, M. S. & Hong, S. T. Electrochemical Exchange Reaction Mechanism and the Role of Additive Water to Stabilize the Structure of  $\text{VOPO}_4 \cdot 2\text{H}_2\text{O}$  as a Cathode Material for Potassium-Ion Batteries. *ChemSusChem* **12**, 1069-1075 (2019).
- (89) Mathew, V., *et al.* Amorphous iron phosphate: potential host for various charge carrier ions, *NPG Asia Mater.* **6** e138–e147 (2014).
- (90) Xiong, M., Tang, W., Cao, B., Yang, C. & Fan, C. A small-molecule organic cathode with fast charge–discharge capability for K-ion batteries. *J. Mater. Chem. A* **7**, 20127 (2019).
- (91) Han, J. *et al.* Investigation of  $\text{K}_3\text{V}_2(\text{PO}_4)_3/\text{C}$  nanocomposites as high-potential cathode materials for potassium-ion batteries. *Chem. Commun.* **53**, 1805-1808 (2017).
- (92) Han, J. *et al.* Nanocubic  $\text{KTi}_2(\text{PO}_4)_3$  electrodes for potassium-ion batteries. *Chem. Commun.* **52**, 11661-11664 (2016).
- (93) Chihara, K., Katogi, A., Kubota, K. & Komaba, S.  $\text{KVPO}_4\text{F}$  and  $\text{KVOPO}_4$  toward 4 volt-class potassium-ion batteries. *Chem. Commun.* **53**, 5208-5211 (2017).
- (94) Kim, H. *et al.* A New Strategy for High-Voltage Cathodes for K-Ion Batteries: Stoichiometric  $\text{KVPO}_4\text{F}$ . *Adv. Energy Mater.* **8**, 1801591 (2018).
- (95) Jiaying Liao, Qiao Hu, Bo Che, Xiang Ding, Fei Chen and Chunhua Chen, Competing with other polyanionic cathode materials for potassium-ion batteries via fine structure design: new layered  $\text{KVOPO}_4$  with a tailored particle morphology *J. Mater. Chem. A* **7**, 15244 (2019)
- (96) Park, W. B. *et al.*  $\text{KVP}_2\text{O}_7$  as a Robust High-Energy Cathode for Potassium-Ion Batteries: Pinpointed by a Full Screening of the Inorganic Registry under Specific Search Conditions. *Adv. Energy Mater.* **8**, 1703099 (2018).
- (97) Zhang, L. *et al.* Constructing the best symmetric full K-ion battery with the NASICON-type  $\text{K}_3\text{V}_2(\text{PO}_4)_3$ . *Nano Energy* **60**, 432-439 (2019).
- (98) Lin, X., Huang, J., Tan, H., Huang, J. & Zhang, B.  $\text{K}_3\text{V}_2(\text{PO}_4)_2\text{F}_3$  as a robust cathode for potassium-ion batteries. *Energy Storage Mater.* **16**, 97-101 (2019).
- (99) Wang, S., Cui, B., Zhuang, Q., Shi, Y. & Zheng, H. Synthesis and Electrochemical Performance of Cobalt-Doped  $\text{KMnF}_3$  as Cathode Materials for Potassium Ion Batteries. *J. Electrochem Soc.* **166**, A1819-A1826 (2019).
- (100) Lu, K. *et al.* Rechargeable potassium-ion batteries enabled by potassium-iodine conversion chemistry. *Energy Storage Mater.* **16**, 1-5 (2019).
